# Supplementary material for: m6A RNA Methylation Maintains Hematopoietic Stem Cell Identity and Symmetric Commitment
Source: PubMed Central journal article supplement — Cell Rep. Author manuscript; Available in PMC 2019 Oct 29. (PMC6818972; doi:10.1016/j.celrep.2019.07.032), 2019-08-13
Supplement: NIHMS1537432-supplement-1.pdf [file NIHMS1537432-supplement-1.pdf]

**Cell Reports, Volume 28**

## **Supplemental Information**

### **m<sup>6</sup>A RNA Methylation Maintains Hematopoietic Stem Cell Identity and Symmetric Commitment**

**Yuanming Cheng, Hanzhi Luo, Franco Izzo, Brian F. Pickering, Diu Nguyen, Robert Myers, Alexandra Schurer, Saroj Gourkanti, Jens C. Brünig, Ly P. Vu, Samie R. Jaffrey, Dan A. Landau, and Michael G. Kharas**

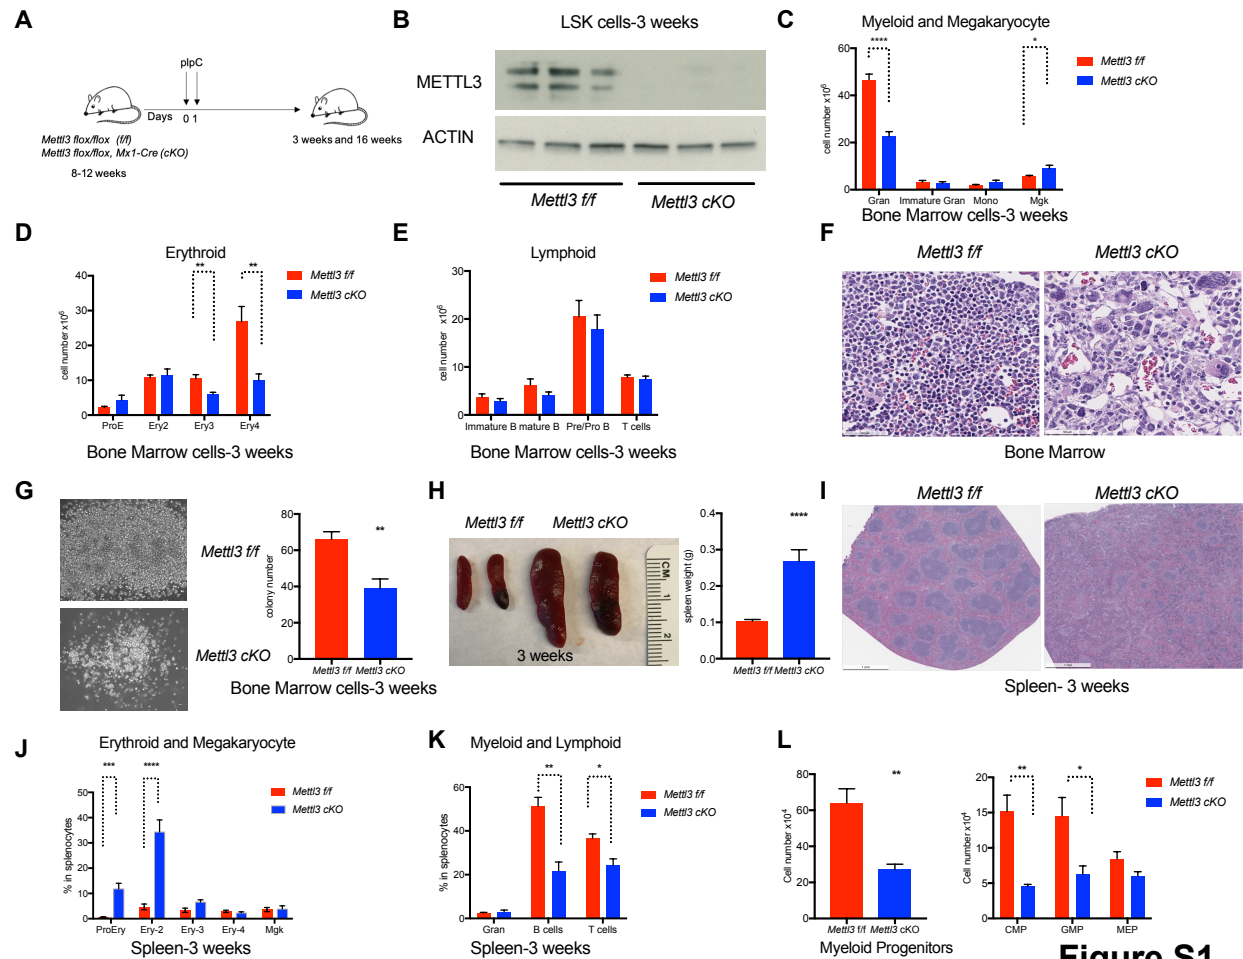

**Figure S1**

**Supplementary Figure 1. m<sup>6</sup>A is essential for normal hematopoiesis. Related to Figure 1.**

All samples were collected from mice at 3 weeks post plpC administration. **(A)** Schematic diagram of the experimental procedure for analyzing *Mettl3* *f/f* and *Mettl3* *cKO* mice. **(B)** Immunoblot to determine METTL3 expression using sorted LSK cells. **(C-E)** Myeloid, megakaryocytes, erythroid, and lymphoid lineage differentiation in BM was determined by flow cytometry base on different cell surface markers. Erythroblast (ProE, Ter119-CD71+; Ery2, Ter119+CD71+; Ery3, Ter119+CD71<sup>mid</sup>; Ery4, Ter119+CD71-), Gran (Granulocyte, Gr1+Mac1+), Immature Granulocyte(Mac1+Gr1<sup>mid</sup>), Monocyte(Mac1+Gr1-), Megakaryocytes (Mgk, CD41+), Immature B cells(B220+IgM+), Pre/Pro B cells (B220+IgM-), Mature B cells (B220<sup>hi</sup>IgM+), T cells (CD3+). n=11. **(F)** Representative images show H&E-stained cross sections of BM isolated from the *Mettl3* *f/f* and *Mettl3* *cKO* mice. **(G)** *Mettl3* depleted BM formed fewer and smaller colonies. *Mettl3* *f/f* and METTL3 depleted BM cells were plated in methylcellulose cultures, supplemented with cytokines. Left: Representative images of flox/flox and cKO colony. Right: Colonies were scored 10 days after plating. n =9,7. **(H)** Splenomegaly is observed in cKO mice three weeks post plpC administration. Left: representative image of spleens from indicated mice. Right: measurement of spleen weight from *Mettl3* *f/f* and *Mettl3* *cKO* mice. n=11. **(I)** Representative images show H&E-stained cross sections of spleens isolated from the *Mettl3* *f/f* and *Mettl3* *cKO* mice. **(J, K)** Erythroid, myeloid and lymphoid cells were determined by flow cytometry in *Mettl3* *f/f* and *Mettl3* *cKO* spleens. Cell population was determined by cell surface marker. n=8. **(L)** Absolute numbers of myeloid progenitor (MP, Lin-ckit+Sca1-), CMP(Lin-cKit+Sca1-CD34+FcrR-), GMP (Lin-cKit+Sca1-CD34+FcrR+) and MEP(Lin-cKit+Sca1-CD34-FcrR-) in *Mettl3* *f/f* and *Mettl3* *cKO* BM. n=10, 6. Mean and SEM are shown (\*, P < 0.05; \*\*, P < 0.01; \*\*\*, P < 0.001, \*\*\*\*, P < 0.0001).



**Supplementary Figure 2. *Mettl3* required for HSC reconstitution capacity. Related to Figure 2.**

(A) Whole bone marrow cellularity in *Mettl3 f/f* and *Het,Cre+* (*Mettl3 f/-, Mx1-Cre*) mice. n=4. (B) Whole blood counts of white blood cell (WBCs), red blood cells (RBCs), platelets (PLT) of *Mettl3 f/f* and *Het,Cre+* mice. n=4. (C) Spleen weight of *Mettl3 f/f* and *Het,Cre+* mice. n=4. (D) Mature lineage cells were determined by flow cytometry in *Mettl3 f/f* and *Het,Cre+* spleens base on cell surface marker as shown in **Supplementary Figure1**. n=4. (E, F) Frequency of hematopoietic stem and progenitor compartments (LSK, HSC, MPP1, MPP2 and MPP4) and myeloid progenitors (MP, CMP, GMP and MEP) in *Mettl3 f/f* and *Het,Cre+* mice bone marrow. n=4. (G, H) Erythroid, myeloid, megakaryocytes and lymphoid lineage differentiation in *Mettl3 f/f* and *Het,Cre+* mice were assessed by flow cytometry base on cell surface markers. n=4. (I) *Mettl3 cKO* HSC cells are more proliferative. Representative flow cytometry plots and quantification of *Mettl3 f/f* and *Mettl3 cKO* HSC cell cycle by Ki67 staining. n=5. (J) Increased mitochondrial activity in *Mettl3 cKO* HSCs. Left: representative histograms of Dilc5 staining in *Mettl3 f/f* and *Mettl3 cKO* HSCs. Right: Mitochondrial membrane potential in HSPC compartments was assessed by Dilc5 staining quantified by flow cytometry. n=5. (K) Representative flow cytometry of surface markers to indicate engraftment of CD45.2 donor cells in LSK population from non-competitive transplanted recipient mice. (L) *Mettl3 cKO* HSCs have impaired reconstitution capacity. Chimerism of CD45.2 in different lineage cell populations in peripheral blood from non-competitive transplanted recipient mice. n=10. (M,N) Cell autonomous transplant experiments. (M) Comparable engraftment of *Mettl3 flox/flox*, *Mx1-Cre-* and *Mx1-Cre+* recipient pre-plpC. Chimerism of CD45.2 donor cells in peripheral blood from recipient mice was analyzed before plpC injection. n=15. (N) CD45.2 chimerism analysis of myeloid, erythroid and lymphoid cells from recipient mice. Cell compartment is determined by cell surface marker as showed previously. n=5. Mean and SEM are shown (\*,  $P < 0.05$ ; \*\*,  $P < 0.01$ ; \*\*\*,  $P < 0.001$ , \*\*\*\*,  $P < 0.0001$ ).

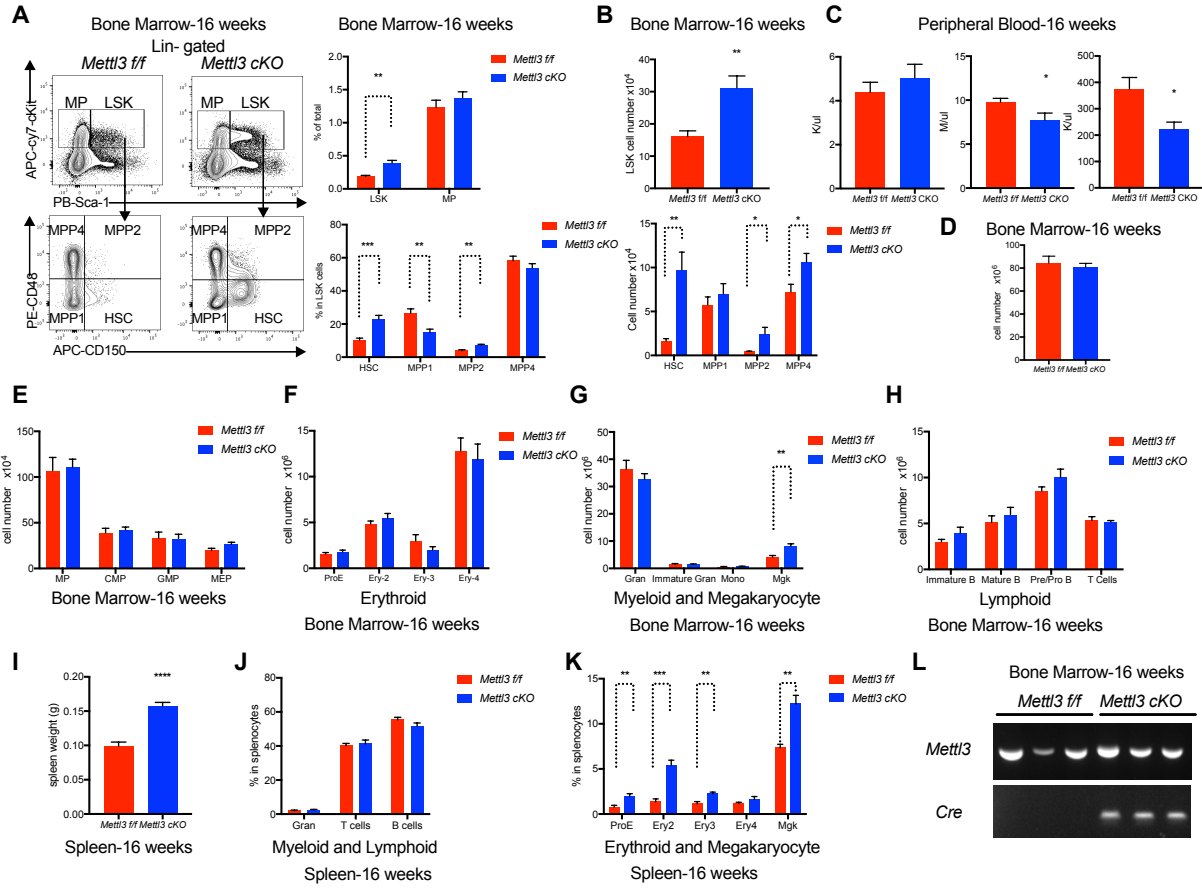

**Figure S3**

**Supplementary Figure 3. HSPC expansion persists in *Mettl3* cKO mice 16 weeks post plpC. Related to Figure 3.**

All samples used were from *Mettl3* f/f and *Mettl3* cKO mice at 16 weeks post plpC. **(A)** Left: Representative flow cytometry plots of surface markers to indicate the stem and progenitor cell compartments in BM. Right: Frequency of LSK and MP in BM cells and percentage of HSC, MPP1, MPP2 and MPP4 in LSK population. n=6. **(B)** Absolute cell numbers of LSK, HSC and MPPs, from indicated mice at 16 weeks post plpC as assessed by flow cytometry. n=6. **(C)** Whole blood counts of white blood cell (WBCs), red blood cells (RBCs), platelets (PLT) of *Mettl3* f/f and *Mettl3* cKO mice. **(D)** Bone marrow cellularity of *Mettl3* f/f and *Mettl3* cKO mice. n=6. **(E)** Absolute cell numbers of progenitor, CMP, GMP and MEP in BM cells. n=6. **(F-H)** Erythroid, myeloid, megakaryocytes and lymphoid lineage differentiation in long-term METTL3 deleted mice were assessed by flow cytometry base on cell surface markers as shown in **Supplementary Figure1**.n=6. **(I)** Measurement of spleen weight from *Mettl3* f/f and *Mettl3* cKO mice. n=6. **(J,K)** Erythroid, myeloid and lymphoid cells were evaluated by flow cytometry in splenocytes. n=6. **(L)** Genotyping PCR using genomic DNA from *Mettl3* f/f and *Mettl3* cKO mice bone marrow cells at 16 weeks post plpC. Mean and SEM are shown (\*,  $P < 0.05$ ; \*\*,  $P < 0.01$ ; \*\*\*,  $P < 0.001$ , \*\*\*\*,  $P < 0.0001$ ).

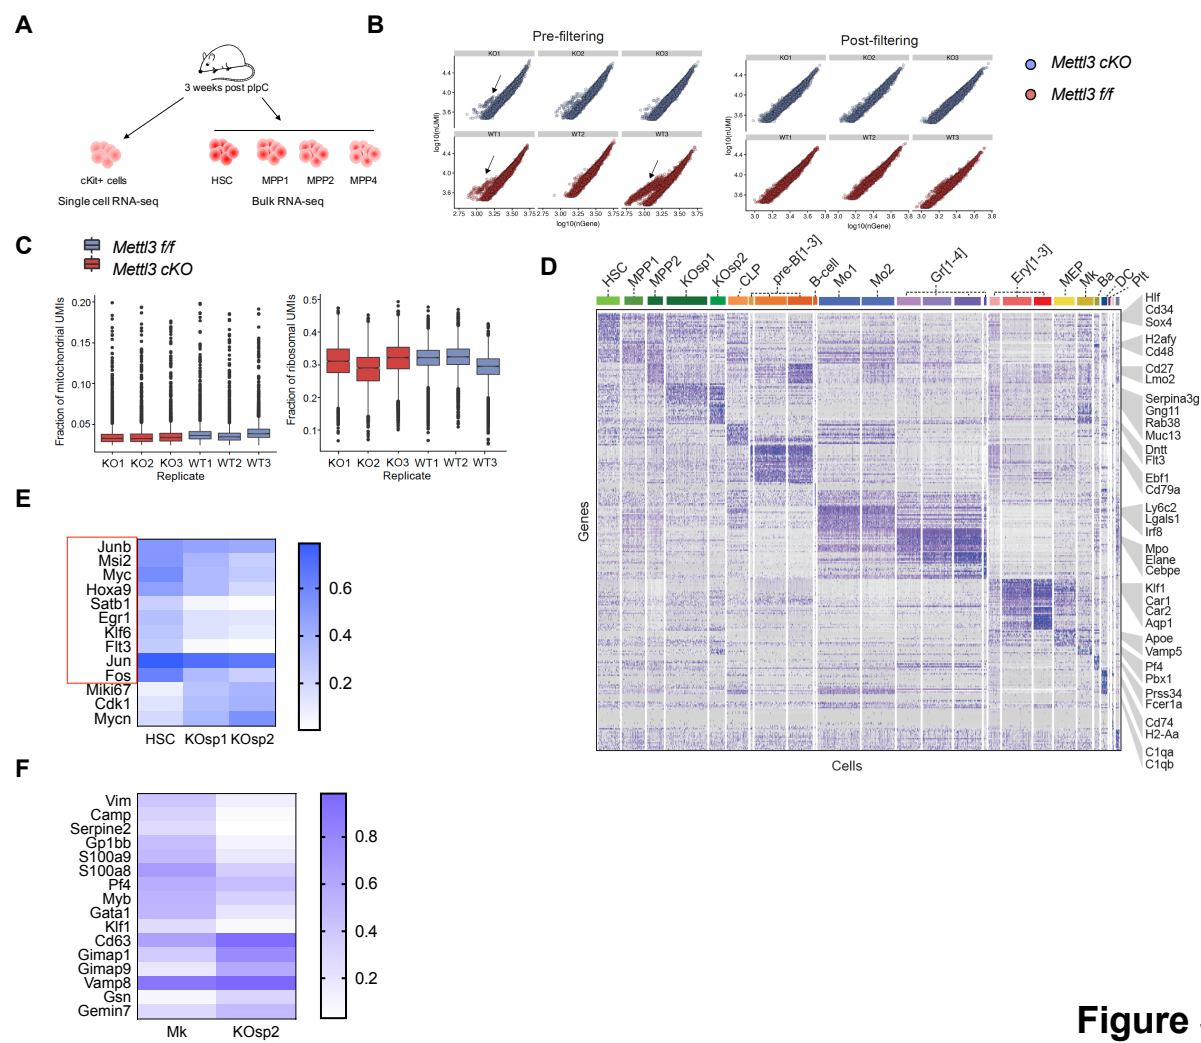

**Figure S4**

**Supplementary Figure 4. Loss of *Mettl3* results in new HSC-like clusters base on scRNA-seq. Related to Figure 4.**

**(A)** Scheme of experiment strategy for single cell RNA-seq and bulk RNA-seq. **(B)** Filter strategy in three replicates of single cell RNA-seq. **(C)** Number of ribosomal or mitochondrial reads detected for each cell in each replicate. **(D)** Single-cell transcriptome landscape defined by gene expression. Different cell cluster was labeled. **(E)** Heatmap to show differentially expressed genes in *Mettl3* cKO specific clusters compared to HSC cluster. **(F)** Representative differentially expressed genes between KOsp2 cluster and Megakaryocytes cluster were shown as heat map.

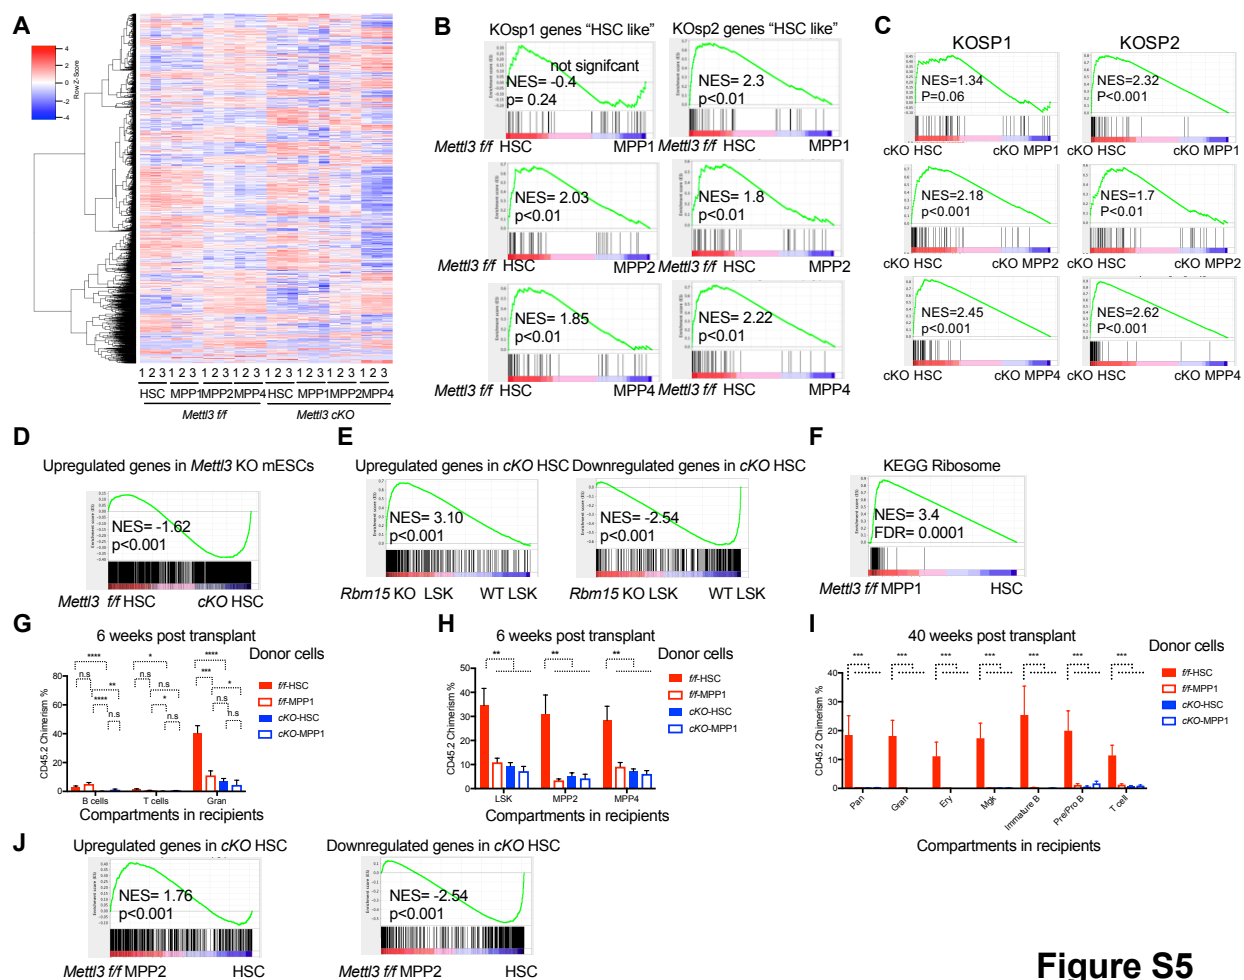

### Figure S5

**Supplementary Figure 5. HSC identity is altered in *Mettl3* cKO mice. Related to Figure 5.**

**(A)** Unsupervised clustering of differentially expressed genes in three replicates of *Mettl3* *f/f* and *Mettl3* cKO HSC, MPP1, MPP2 and MPP4 cells were shown. **(B)** *Mettl3* cKO specific clusters are cKO HSC-like based on gene expression. GSEA analysis of cKO specific cell clusters gene sets (top 50 expressed genes from scRNA-seq) against rank lists of differentially expressed genes between *Mettl3* cKO HSCs and cKO MPPs. **(C)** GSEA analysis with top expressed genes in cKO specific cell clusters from scRNA-seq showing the signature of genes enriched in *Mettl3* *f/f* HSCs. **(D)** *Mettl3* KO ESC signature is enriched in *Mettl3* cKO HSCs. Gene Set Enrichment Analysis of upregulated genes in *Mettl3* KO mESCs against the ranklist of differentially expressed genes between *Mettl3* *f/f* and *Mettl3* cKO HSCs. Normalized enrichment score and p value are shown. **(E)** Gene-set enrichment for up or down regulated genes in *Mettl3* cKO HSCs, as compared to differentially expressed genes in RBM15 KO LSK cells. Normalized enrichment score and FDR are shown. **(F)** *Mettl3* *f/f* MPP1 was enriched in KEGG ribosome gene set in regulating translation compared to *Mettl3* *f/f* HSCs. **(G-I)** HSCs and MPP1s from cKO mice fail to engraft in recipient mice in a competitive manner. Sorted HSCs and MPP1s from *Mettl3* *f/f* and *Mettl3* cKO mice were injected into CD45.1 recipient mice competitively with normal CD45.1 BM cells. **(G)** CD45.2 chimerism was shown in peripheral blood at 4 weeks post transplantation. n=10. **(H)** CD45.2 chimerism analysis to show donor engraftment in LSK, MPP2 and MPP4 compartments. n=10. **(I)** Engraftment of CD45.2 donor cells was analyzed in lineage compartments from recipient mice at 40 weeks. n=10. **(J)** Gene-set enrichment analysis plots of up or down regulated genes in *Mettl3* cKO HSC identified by bulk RNA-seq, against the rank list of differentially expressed genes between *Mettl3* *f/f* HSC and *Mettl3* *f/f* MPP2. Mean and SEM are shown (\*,  $P < 0.05$ ; \*\*,  $P < 0.01$ ; \*\*\*,  $P < 0.001$ , \*\*\*\*,  $P < 0.0001$ ).

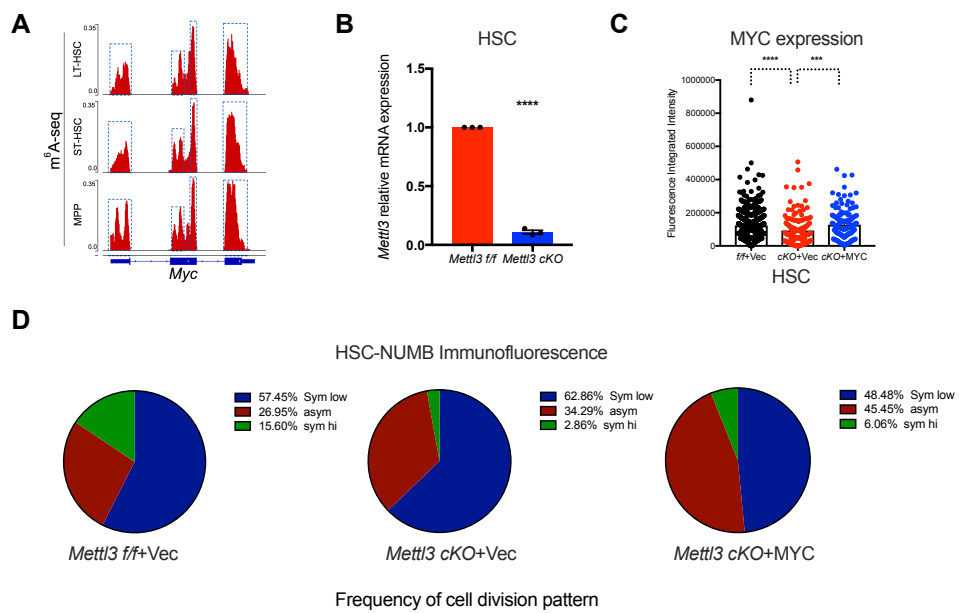

**Figure S6**

**Supplementary Figure 6. m<sup>6</sup>A-mediated *Myc* regulation is essential for HSC asymmetric and symmetric cell division. Related to Figure 6.**

**(A)** m<sup>6</sup>A marks on *Myc* transcripts in HSCs and MPPs. m<sup>6</sup>A peaks were indicated in dot line square. **(B)** qRT-PCR of *Mettl3* in *Mettl3* *f/f* and *Mettl3* *cKO* HSCs. **(C,D)** Overexpression of MYC in *Mettl3* *cKO* HSCs partially rescued HSC symmetric commitment defect in pair daughter assay as quantified by immunofluorescence. Number of daughter pairs assessed: *Mettl3* *f/f* +Vec, n=141; *cKO*+Vec, n=35; *cKO*+MYC, n=33.

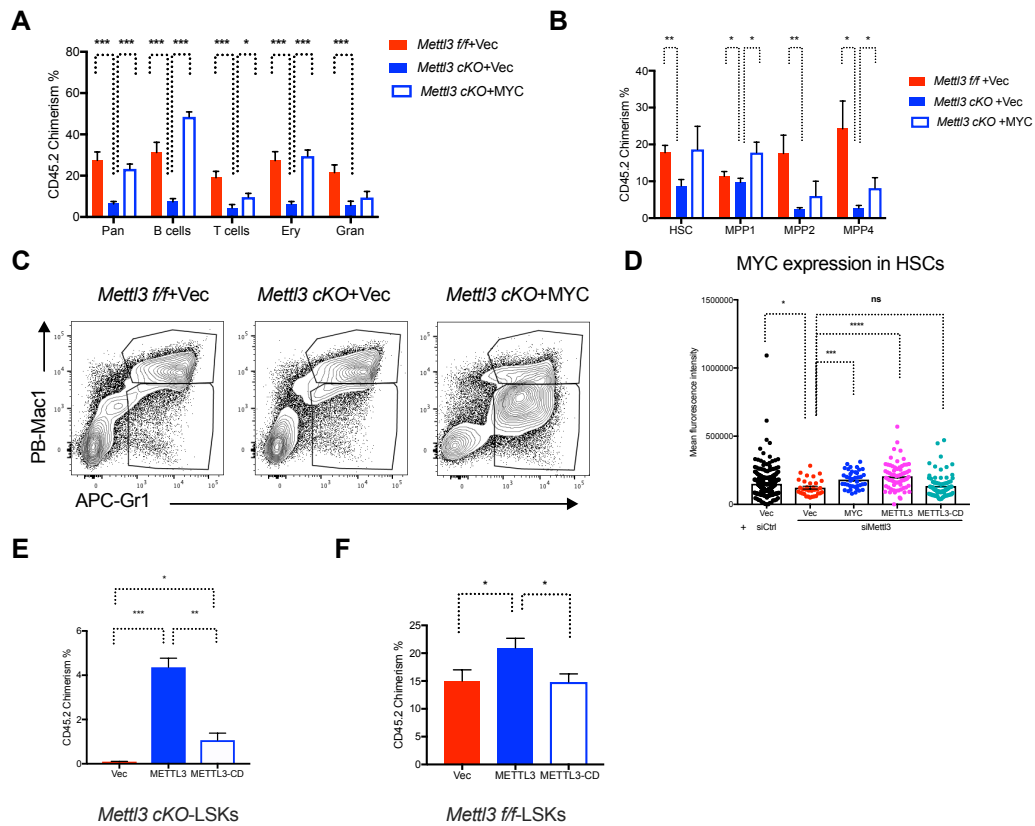

**Figure S7**

**Supplementary Figure 7. METTL3 and MYC partially rescue defect in *Mettl3* cKO HSCs. Related to Figure 7.**

**(A-C)** Sorted control or *Mettl3* cKO LSK cells transduced with control or MYC overexpression retrovirus and then transplanted into recipient mice. **(A)** Engraftment of donor-derived CD45.2 cells in different lineage cells including B cells(B220+), T cells (CD3+), Erythroblast (Ter119+) and Granulocyte (Gr1+). n=10. **(B)** Engraftment of donor-derived CD45.2 cells in HSC and MPP compartments in recipient mice BM. n=10. **(C)** Representative flow cytometry plots to show abnormal myeloblast in recipient mice transplanted with MYC overexpressed *Mettl3* cKO LSKs. **(D)** Sorted HSCs were co-transfected with control or *Mettl3* siRNA together with empty vector or MYC, METTL3, METTL3-CD constructs as indicated in the figure. Overall MYC expression is quantified by immunofluorescence. **(E)** LSK cells were sorted from *Mettl3* cKO mice and transduced with control or wild-type METTL3 or catalytically dead METTL3 (METTL3-CD) overexpression retrovirus. Donor cells were then transplanted into CD45.1 recipient mice with CD45.1 competitor BM cells. CD45.2 chimerism was shown in peripheral blood at 4 weeks post transplantation. n=5. **(F)** Sorted *Mettl3* f/f LSK cells were transduced with a retrovirus expressing GFP together with an empty vector as control, or a retrovirus expressing METTL3 or METTL3-CD and then transplanted into recipient mice. CD45.2 donor engraftment was analyzed at 4 weeks post-transplant. n=10. Mean and SEM are shown (\*,  $P < 0.05$ ; \*\*,  $P < 0.01$ ; \*\*\*,  $P < 0.001$ , \*\*\*\*,  $P < 0.0001$ ).
